# Supplementary material for: Mutations in FLS2 Ser-938 Dissect Signaling Activation in FLS2-Mediated Arabidopsis Immunity
Source: PubMed Central journal article supplement (PMC3630090; doi:10.1371/journal.ppat.1003313), 2013-04-18
Supplement: ppat.1003313.s001.pdf [file ppat.1003313.s001.pdf]

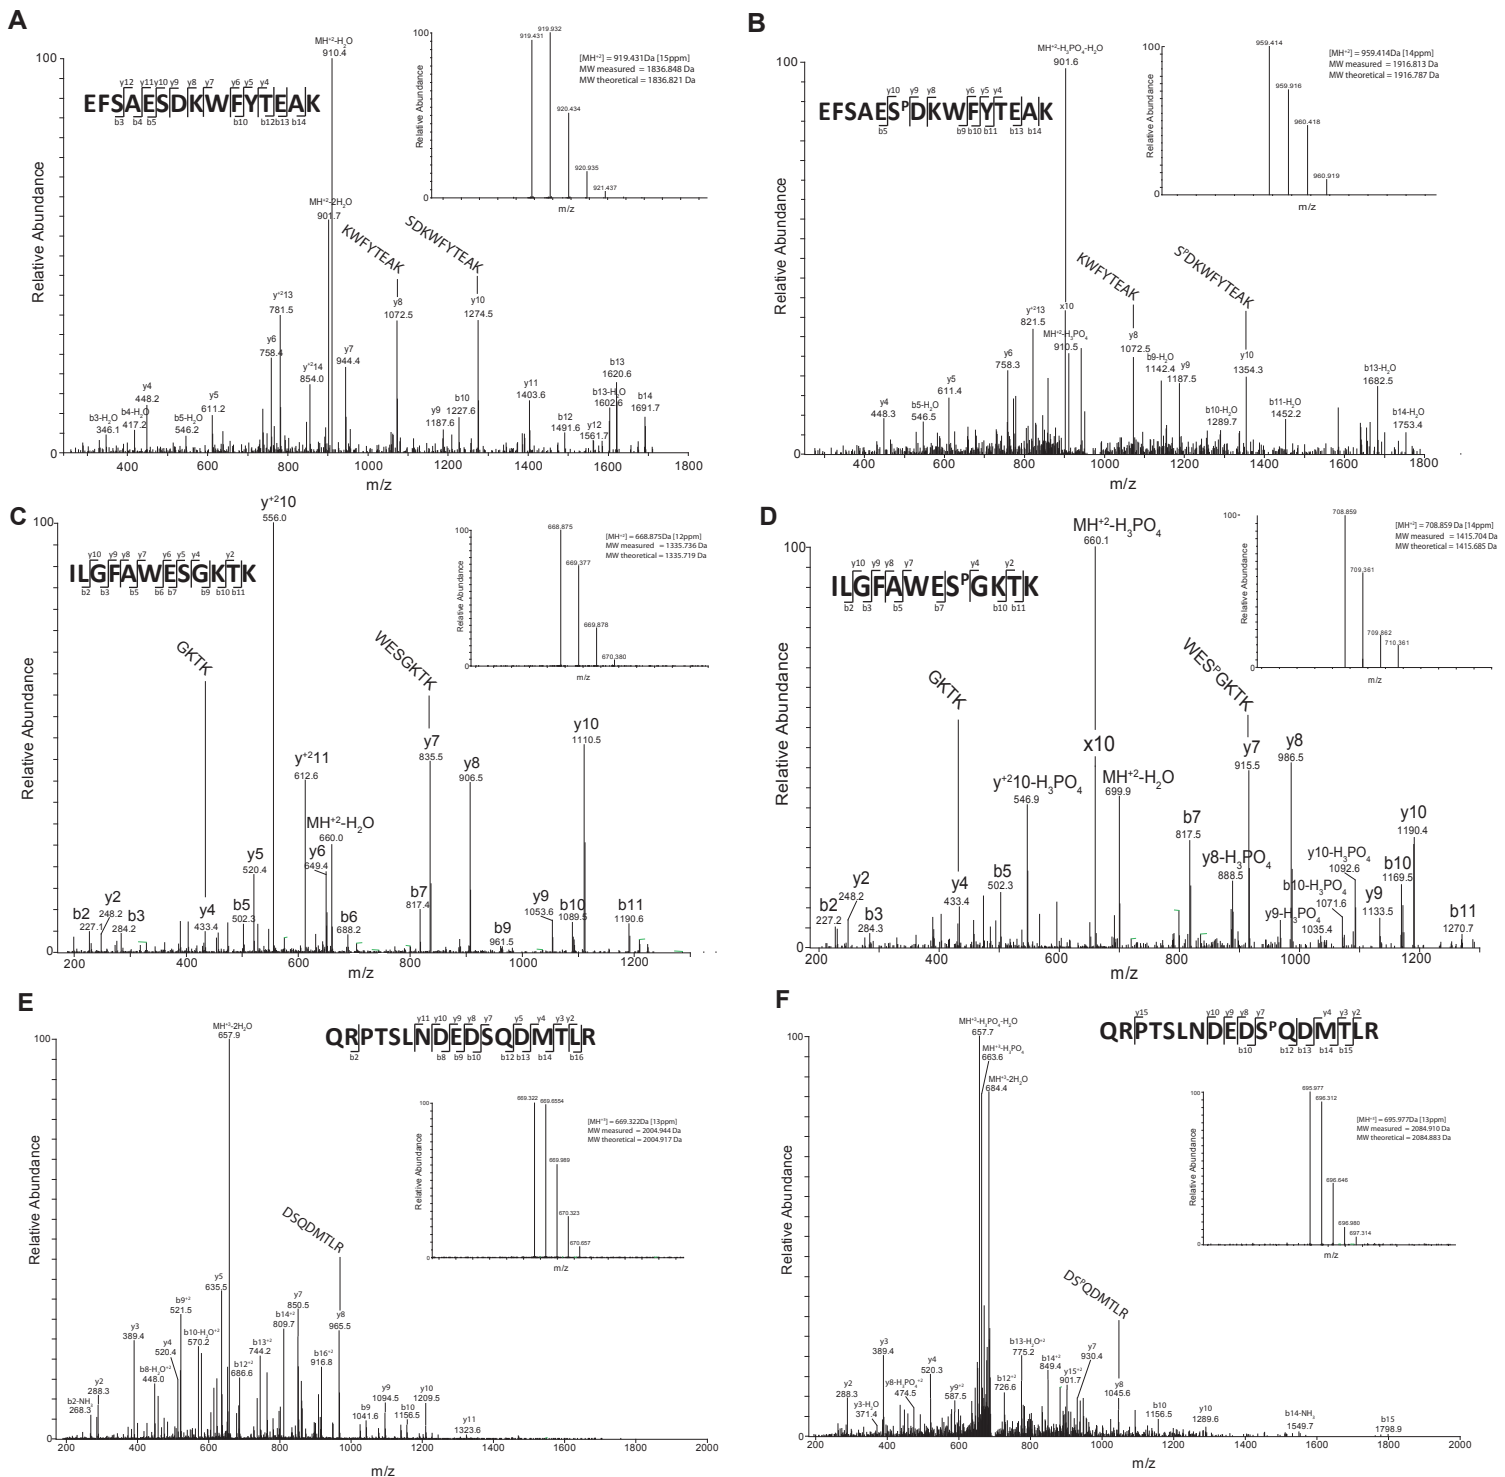

**Supplemental Figure 1.** Mass spectrometry analysis of *in vitro* phosphorylation sites of FLS2. LTQ-Orbitrap MS/MS spectra identifying FLS2 kinase *in vitro* phosphorylation sites. Each LTQ MS/MS spectrum also contains averaged Orbitrap spectra of its precursor ion with its observed mass and mass error from theoretically determined neutral mass. Both phosphorylated and its unmodified pair are represented.
