# Supplementary material for: Mutations in FLS2 Ser-938 Dissect Signaling Activation in FLS2-Mediated Arabidopsis Immunity
Source: PubMed Central journal article supplement (PMC3630090; doi:10.1371/journal.ppat.1003313), 2013-04-18
Supplement: ppat.1003313.s003.pdf [file ppat.1003313.s003.pdf]

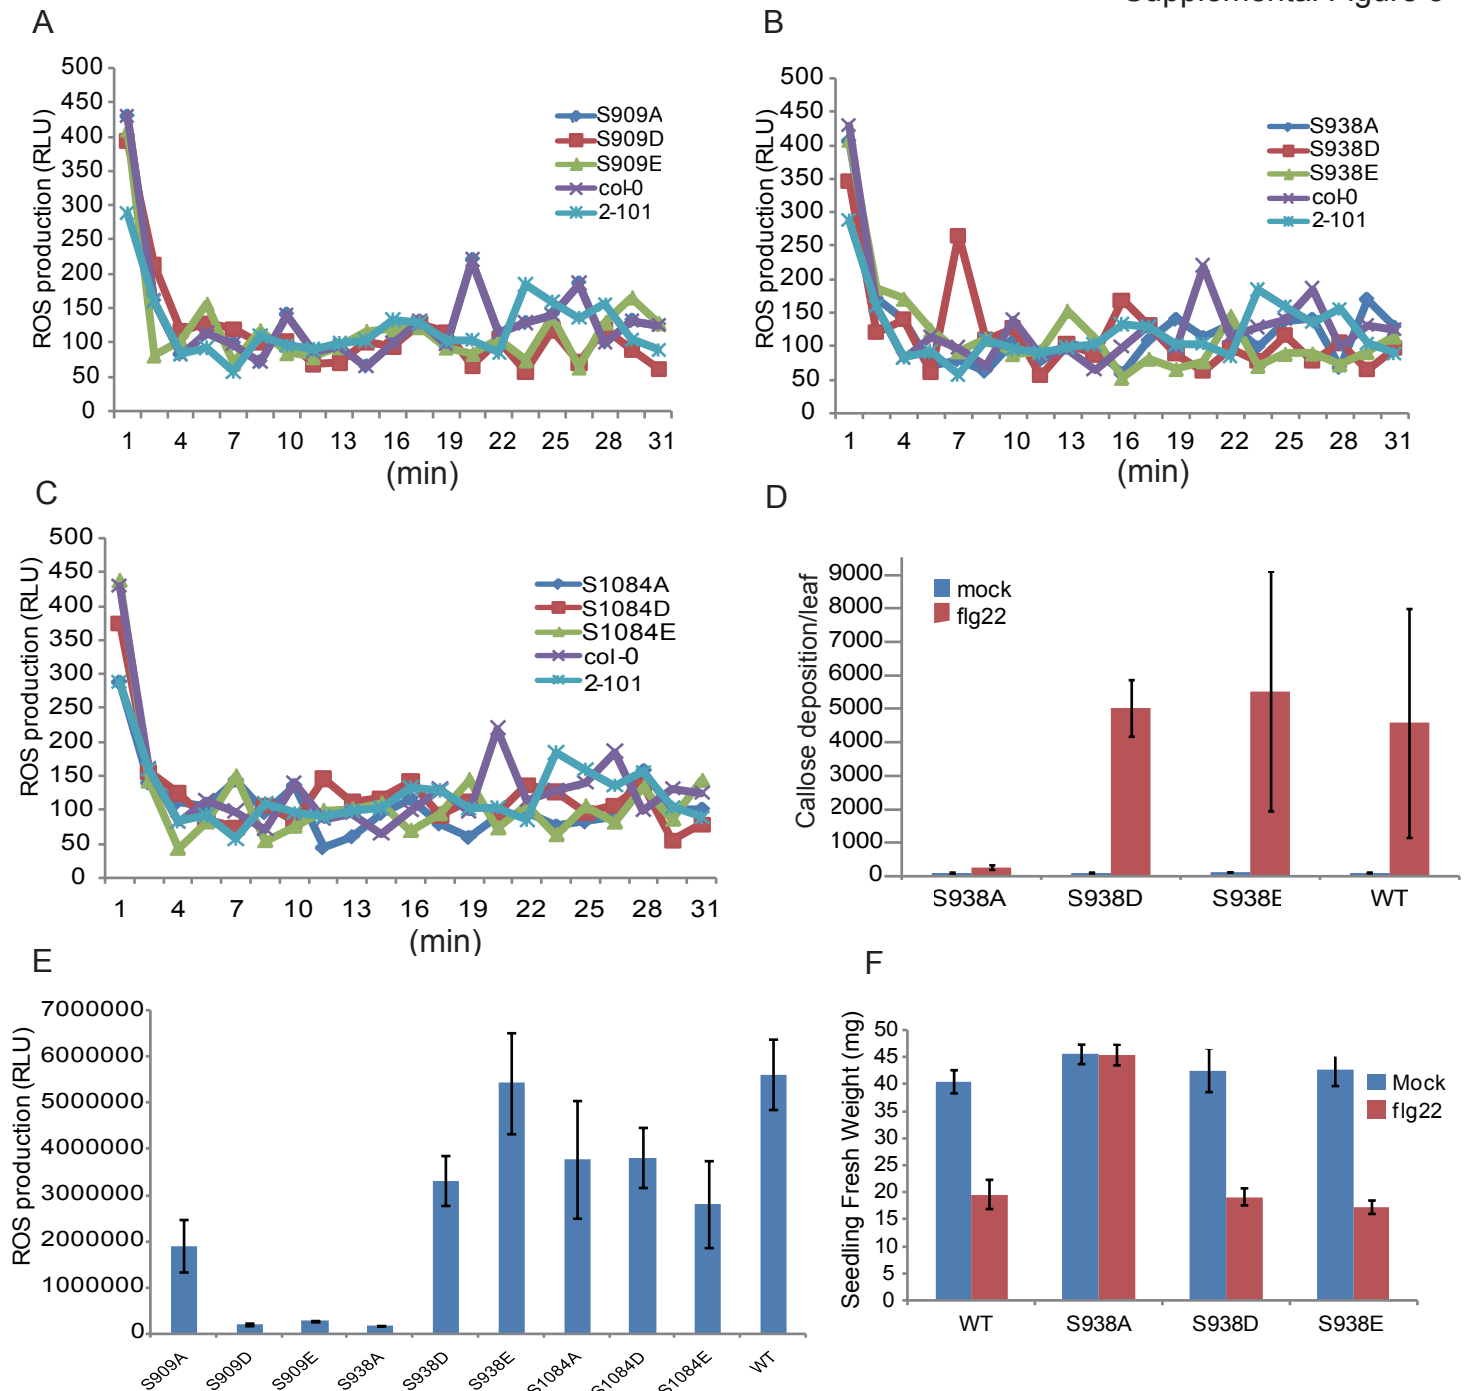

**Supplemental Figure 3.** Physiological responses under flg22 treatment.

Leaf discs were taken from T2 transgenic *Arabidopsis* expressing *FLS2-WT*, *FLS2-S909A/D/E* (**A**), *FLS2-S938A/D/E* (**B**) and *FLS2-S1084A/D/E* (**C**) and measured by luminol assay. Note: Y-axis is magnified about 20-fold compared with Figure 1D, E, and F. (**D**) Quantification of callose deposition as shown in Figure 2A-D by using ImageJ software. Error bar indicates SD (n=6). (**E**) Quantification of ROS production as shown in Figure 1D-F, each bar indicates area under the curve. Error bar indicates SD (n=8). (**F**) Seedling growth inhibition assay, same raw data as in Figure 2F, shown as seedling fresh weight.
