# Supplementary material for: Mutations in FLS2 Ser-938 Dissect Signaling Activation in FLS2-Mediated Arabidopsis Immunity
Source: PubMed Central journal article supplement (PMC3630090; doi:10.1371/journal.ppat.1003313), 2013-04-18
Supplement: ppat.1003313.s006.pdf [file ppat.1003313.s006.pdf]

```

AT3G47090.1 -----KRRKNNQKINNSAPFTLEIFHEKLSYGDLRNATDGF S
AT3G47580.1 -----RKRKRNQQTNNLVPKLEIFHEKISYGDLRNATNGF S
AT3G47570.1 -----RKRKKNKETNNPTPSTLEVLHEKISYGDLRNATNGF S
AT3G47110.1 -----F S
AT5G20480.1 -----FMKRKKKNNASDGNPSDSTTLGMFHEKVSYEELHSATSRF S
AT5G39390.1 -----KKN-----DKISYEELYNATSGF S
AT2G24130.1 IATPVLCVFGYPLVQSRFQKNTLVYAKEEVEDEEKQNDPKYPRISYQQLIAATGGFN
AT5G46330.1 (FLS2) -----KKKEKKIENSSSESLPDLDSALKLKRFPKLEQATDSFN 871
*
AT3G47090.1 SSNIVGSGSFGTVFKALLQ TENKIVAVKVLN--MQRGAMKSFMAECESLKD IHRHNLV K
AT3G47580.1 SSNMVGSFGTVFKALLP TESKIVAVKVLN--MQRGAMKSFMAECESLKD TRHRNLV K
AT3G47570.1 SSNMVGSFGTVYKALLL TEKKVAVKVLN--MQRGAMKSFMAECESLKD IHRHNLV K
AT3G47110.1 SSNLIGSGNFGAVFKGFLGSKNKAVAIKVLN--LCKRGAAKSFIAECEALGGIRHNLV K
AT5G20480.1 STNLIGSGNFGNVFKLLG PENKLVAVKVLN--LLKHGATKSFMAECETFKGIRHNLV K
AT5G39390.1 SSNLIGSGNFSDFKGLLGL EELKLVAVKVLN--LLKHGATKSFIAECESFKGIRHNLAK
AT2G24130.1 ASSLIGSGRF GHVYKGLVRN-NTKVAVKVLDP-KTALEFSGSFKRECQILKRTRHNLIR
AT5G46330.1 SANIIGSSSLSTVYKQLED-GTVI AVKVLNLKEFSAESDKWFYTEAKTLSQLKHRNLV K 930
:::.*. . . *:* . * . . :*:***: * *.: : :**** :
AT3G47090.1 LLTACASIDFQGNFRAL IYEFMPNGSLDKWLHP EEEV EIIHRPSRTL TLLERLNI AIDVA
AT3G47580.1 LLTACASTDFQGNFRAL IYEYLPNGSVDMLWHP EEEV EIRRPPRTL TLLERLNI VIDVA
AT3G47570.1 LLTACSSIDFQGNFRAL IYEFMPNGSLDMWLHP EEEV EIIHRPSRTL TLLERLNI AIDVA
AT3G47110.1 LVTICSSDFEGNDFRAL VYEFMPNGNLDMLWHP DEIEETGNPSRTLGLFARLNI AIDVA
AT5G20480.1 LITVCSLDSEGNDFRAL VYEFMPKGS LDMWLQLEDL ERVNDHSRSLTPAEKLN I AIDVA
AT5G39390.1 LITVCSLSDSQGNDFRAL VYEFMPKGS LDMWLQPEDLESANNHSRSLTFAEKVNI AIDVA
AT2G24130.1 IITTCCKPG-----FNALVLPMPNGSLERHLYPGEYS-----SKNLDLIQLVNICSDVA
AT5G46330.1 ILGFAWESG-----KTALVLPFMENGNLED TIHG-----SAAPIGSLLEKIDLCVHI A 979
:: . . . * . * . * . * . * . * . * . * . * . * . * . * . * . * . * . *
AT3G47090.1 SVLDYLHVHCHEPIAHC DLKPSNILLDDDLTAHV SDFGLARLLLKFDQESFFNQLSSAG -
AT3G47580.1 SVLDYLHVHCHEPIAHC DLKPSNVLLEDDLTAHV SDFGLARLLLKFDKESFLNQLSSAG -
AT3G47570.1 SVLDYLHVHCHEPIAHC DLKPSNVLLEDDLTAHV SDFGLARLLLKFDDEESFFNQLSSAG -
AT3G47110.1 SALVYLHTYCHNP IAHCDIKPSNILLDKDLTAHV SDFGLAQLLLKFDRTDFHIQFSSAG -
AT5G20480.1 SALEYLHVCHDPVAHCDIKPSNILLDDDLTAHV SDFGLAQLLYKYDRESFLNQFSSAG -
AT5G39390.1 SALEYLHVYCHDPVAHCDIKPSNVLLEDDLTAHV SDFGLARLLYNFDEKTFLNQFSSAG -
AT2G24130.1 EGIAYLHHYSPV VVHCDLKPSNILLDDEMTALV TDFGISRLVQVEETVSTDDSVSFGS
AT5G46330.1 SGIDYLHSGYGFPIVHCDLKPNI LLDSRVAHV SDFGTARILGFREDGSTTASTSAFE - 1038
. : * * * . : * * * : * * * : * * * : * * * : * * * : * * * : * * * : * * * :
↑
AT3G47090.1 ----VRGTIGYAAPEYGMGGQPSIHGDVYSFGV L VLEMFTGKRPT--NELFGGNFTLNS Y
AT3G47580.1 ----VRGTIGYAAPEYGMGGQPSIHGDVYSFGV L LLEMFTGKRPT--DELFGGNLTLHS Y
AT3G47570.1 ----VRGTIGYAAPEYGVGGQPSINGDVYSFGI L LLEMFTGKRPT--NELFGGNFTLNS Y
AT3G47110.1 ----VRGTIGYAAPEYGMGGHPSINGDVYSFGI V LLEIFTGKRPT--NKLFVDGLTLHS F
AT5G20480.1 ----VRGTIGYAAPEYGMGGQPSIQGDVYSFGI L LLEMFTSGKKPT--DESFAGDYNLHS Y
AT5G39390.1 ----VRGTIGYAAPEYGMGKPSIQGDVYSFGV L LLEMFTGKKPT--DNSFGGGYNLHG Y
AT2G24130.1 TDGLLCGSVGYIAPEYGMKRASTHG DVYSFGV L LLEIVSRRPT--DVLVNEGSSLHE F
AT5G46330.1 -----GTIGYLAPEFAYMRKVTTKADVFSFGI IMMELMTKQRP TSLNDEDSQDMTLRQL 1092
* : * * * * * : : . * * * * * : : * * * : * * * : * * * : * * * :
AT3G47090.1 TKAALPER-VLDIADK SILHSLR VGFVLECLK-----GILDVGLRCCEESPLNRLAT S
AT3G47580.1 TKLALPEK-VFEIADKAILHIGLRVGFRTAECLT-----LVLEVGLRCCEEYPTNRLAT S
AT3G47570.1 TKSALPER-ILDIVDESILHIGLRVGFVVECLT-----MVFEVGLRCCEESPNNRLAT S
AT3G47110.1 TKSALQKROALDITDETILRGAYA QHFN MVECLT-----LVFRVGVSCSEESPVNRISMA
AT5G20480.1 TKSILSGC-----TSSGGSNAID EGLR-----LVLVQVGIKCEEYPRDRMRT D
AT5G39390.1 TKSVLSCS-----TSRGRMTMDEWLR-----LVLEVGIKCEEYPRDRMGM A
AT2G24130.1 MKSHYPDS-LEGIIEQALS R WPKQKPEKCEK L WREVIEMIE LGLVCTQYNPSTRPDM L
AT5G46330.1 VEKSIGNGRKGMVRVLD MELGDSIVSLKQEEAIED-----FLKLC L FCTSSRPEDRPMN 1147
: * : * : * : * : *
AT3G47090.1 EAAKELISIRERFFKTRRTARR-----
AT3G47580.1 EVAKELISIRERFFKTRRTPRR-----
AT3G47570.1 IVVKELISIRERFFKASRTTWR-----
AT3G47110.1 EAISKLVSIRESFRRDEET-----
AT5G20480.1 EAVRELISIRSKFFS KTTITESP R DAPQSSPQEWMLNTDMHTM
AT5G39390.1 EAVRELVSIKSKFF TSSR-----
AT2G24130.1 DVAHEMGR LKEYLFA C PSL LHFSSQETQGEASS-----
AT5G46330.1 EILTHLMKLRGKANSFREDR NEDREV (1173 = end of FLS2)
.: :.

```

**Supplemental Figure 6.** Lack of conservation of FLS2 Ser-938 in related non-RD kinases. Sequence alignment of kinase domains of non-RD kinases from LRR-RLK subfamily XII in Arabidopsis (Shiu and Bleecker, 2001). Red arrow indicates phosphorylation site Ser-938 of FLS2, which resides in a 10 amino acid region that aligns only poorly with the closest related Arabidopsis kinases. Black arrow indicates the conserved D997 in kinase active site.

Shiu SH, and Bleecker AB, 2001. Receptor-like kinases from Arabidopsis form a monophyletic gene family related to animal receptor kinases. Proc Natl Acad Sci. 98: 10763-10768.
