# Supplementary material for: Mutations in FLS2 Ser-938 Dissect Signaling Activation in FLS2-Mediated Arabidopsis Immunity
Source: PubMed Central journal article supplement (PMC3630090; doi:10.1371/journal.ppat.1003313), 2013-04-18
Supplement: ppat.1003313.s008.pdf [file ppat.1003313.s008.pdf]

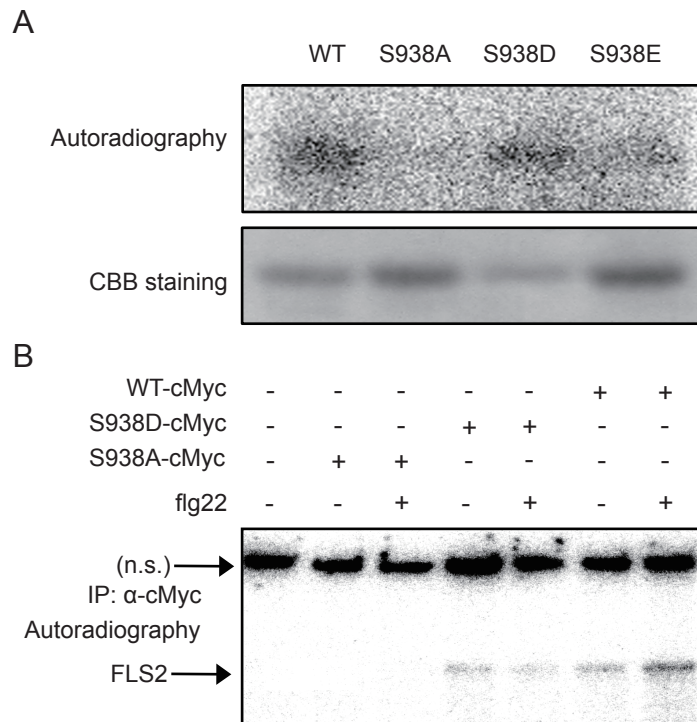

**Supplemental Figure 8.** Ser-938 may be important for phosphorylation of FLS2 in vitro and in vivo.

**A.** In vitro autophosphorylation activity of purified FLS2 kinase domains expressed from *E. coli* (GST tag removed during purification). Samples were separated by SDS-PAGE and then subjected to autoradiographic detection of  $^{32}\text{P}$ . Lower panel: same samples, stained with Coomassie brilliant blue. Previous studies have also reported that FLS2 protein kinase activity is weak and/or difficult to detect in vitro [14,43,44]. In our experiments, FLS2<sup>WT</sup> had very low autophosphorylation activity that was only detected in some experiments, using high sensitivity settings on the phosphorimager. However, in experiments where autophosphorylation activity of FLS2<sup>WT</sup> was detected, FLS2<sup>S938A</sup> lacked activity, suggesting that Ser-938 may be required for the autophosphorylation activity of FLS2. FLS2<sup>S938D</sup> and FLS2<sup>S938E</sup> apparently retained very weak autophosphorylation activity.

**B.** In vivo phosphorylation of FLS2<sup>WT</sup>, FLS2<sup>S938A</sup>, and FLS2<sup>S938D</sup> before (-) or 15 min. after (+) exposure to 1  $\mu\text{M}$  flg22. Col-0 *fls2-101* protoplasts transformed with the indicated full-length FLS2-myc alleles or PEG-only negative control were incubated for 10 hours in media carrying  $^{32}\text{P}$  inorganic phosphate prior to collection, immunoprecipitation using anti-cMyc antibody, separation by SDS-PAGE and autoradiographic detection of  $^{32}\text{P}$ . Note that gel run was very long (lower full-length FLS2 band migrates at ~170 kDa); upper band next to interface with stacking gel migrates at an extremely high apparent M.W. and is non-specific (n.s.; also present in control with no myc tag). The observed phosphorylation of FLS2<sup>S938D</sup> indicates that Ser-938 is not the only phosphorylation site on FLS2. The absence of phosphorylation of FLS2<sup>S938A</sup> is a more tentative observation because, although similar overall protein amounts were loaded in all lanes, the presence of  $^{32}\text{P}$  prevented use of x-ray film to confirm presence of FLS2<sup>S938A</sup> using anti-myc antibody. However, FLS2-S938D-myc and FLS2-WT-myc are visible in this experiment due to  $^{32}\text{P}$  labeling, and in other experiments with FLS2<sup>S938A</sup> its levels were similar to those of FLS2<sup>S938D</sup> and FLS2<sup>WT</sup> (e.g., Fig. 5, Fig. 6, Supplemental Fig. 2 (which includes Endo H tests for normal ER processing), and unpublished experiments).
