# Supplementary material for: Mutations in FLS2 Ser-938 Dissect Signaling Activation in FLS2-Mediated Arabidopsis Immunity
Source: PubMed Central journal article supplement (PMC3630090; doi:10.1371/journal.ppat.1003313), 2013-04-18
Supplement: ppat.1003313.s009.pdf [file ppat.1003313.s009.pdf]

|               |   |   |   |   |   |
|---------------|---|---|---|---|---|
| FLS2-D997A-KD | - | - | - | + | - |
| FLS2-S938D-KD | - | - | + | - | - |
| FLS2-S938A-KD | - | + | - | - | - |
| FLS2-KD       | + | - | - | - | - |
| GST-BIK1      | + | + | + | + | + |

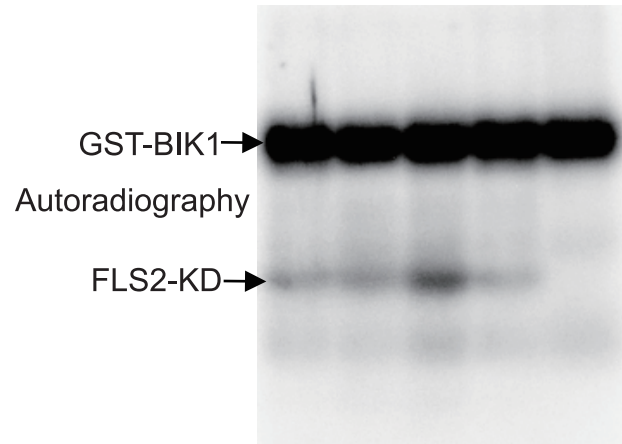

**Supplemental Figure 9.** Second example (see also Figure 4) of transphosphorylation of FLS2 kinase domain by BIK1. Kinase domains of FLS2 (wild-type or mutant as specified), and full-length wild-type BIK1 were purified from *E. coli* as GST fusion proteins; GST was cleaved from FLS2 proteins during purification. In vitro kinase assays carried out in the presence of [ $\gamma^{32}\text{P}$ ]-ATP. Autoradiograph after SDS-PAGE.
