# Supplementary material for: Mutations in FLS2 Ser-938 Dissect Signaling Activation in FLS2-Mediated Arabidopsis Immunity
Source: PubMed Central journal article supplement (PMC3630090; doi:10.1371/journal.ppat.1003313), 2013-04-18
Supplement: ppat.1003313.s010.pdf [file ppat.1003313.s010.pdf]

| Name          | Sequence (5'-3')                     |
|---------------|--------------------------------------|
| FLS2-S909A-F  | GAATTCTCTGCAGAAGCAGACAAGTGGTTCT      |
| FLS2-S909A-R  | AGAACCACCTTGTCTGCTTCTGCAGAGAATTC     |
| FLS2-S909D-F  | GAATTCTCTGCAGAAGACGACAAGTGGTTCTAC    |
| FLS2-S909D-R  | GTAGAACCACCTTGTCTGCTTCTGCAGAGAATTC   |
| FLS2-S909E-F  | GAATTCTCTGCAGAAGAAGACAAGTGGTTCTAC    |
| FLS2-S909E-R  | GTAGAACCACCTTGTCTTCTTCTGCAGAGAATTC   |
| FLS2-S938A-F  | GGGTTTGCCTGGGAAGCCGGCAAACGAAAGCT     |
| FLS2-S938A-R  | AGCTTTCGTTTTGCCGGCTTCCCACGCAAACCC    |
| FLS2-S938D-F  | GGGTTTGCCTGGGAAGACGGCAAACGAAAGCT     |
| FLS2-S938D-R  | AGCTTTCGTTTTGCCGTCTTCCCACGCAAACCC    |
| FLS2-S938E-F  | GGGTTTGCCTGGGAAGAAGGCAAACGAAAGCT     |
| FLS2-S938E-R  | AGCTTTCGTTTTGCCTTCTTCCCACGCAAACCC    |
| FLS2-S1084A-F | GTTGAATGATGAAGATGCACAAGACATGACTTTGC  |
| FLS2-S1084A-R | GCAAAGTCATGTCTTGTGCATCTTCATCATTCAAC  |
| FLS2-S1084D-F | GTTGAATGATGAAGATGACCAAGACATGACTTTGC  |
| FLS2-S1084D-R | GCAAAGTCATGTCTTGGTCATCTTCATCATTCAAC  |
| FLS2-S1084E-F | GTTGAATGATGAAGATGAACAAGACATGACTTTGC  |
| FLS2-S1084E-R | GCAAAGTCATGTCTTGTTCATCTTCATCATTCAAC  |
| BIK1-F        | ATGGGTTCTTGCTTCAGTTCTCG              |
| BIK1-R        | CACAAGGTGCCTGCCAAAAGGTT              |
| PBS1-F        | ATGGGTTGTTTCTCGTGTTTTG               |
| PBS1-R        | CCCGGTACTGTTGCTCTCTG                 |
| PBL1-F        | ATGGGTTCTTGTC TCAGTTC                |
| PBL1-R        | CAATCCAACGGTTTTTTTG                  |
| PBL2-F        | ATGGGTAATT GTTTAGATTC                |
| PBL2-R        | TCTTACACGAGGAGATTGAG                 |
| FLS2T867D-F   | GACGATTCATTCAACAGTGC                 |
| FLS2T867D-R   | CTGTTGAATGAATCGTCTGCTTGCTCCAACCTTTTG |
| FLS2-Kinase-F | CATGGATCCTGCAAGAAAAAAGAAAAAAG        |
| FLS2-R        | AACTTCTCGATCCTCGTTACGATC             |
| Prom-FLS2-F   | CTGTTGAATGAATCGTCTGCTTGCTCCAACCTTTTG |

Supplemental Table 1. Primer sequences used in this study.
